# Supplementary material
Source: PubMed Central journal article supplement (PMC4972332)

A

| Antibody     | sCD4                      |                              |               | gp120 (HXBc2)             |                              |               |
|--------------|---------------------------|------------------------------|---------------|---------------------------|------------------------------|---------------|
|              | $K_{on}$<br>( $10^5$ /Ms) | $K_{off}$<br>( $10^{-5}$ /s) | $K_D$<br>(nM) | $K_{on}$<br>( $10^5$ /Ms) | $K_{off}$<br>( $10^{-5}$ /s) | $K_D$<br>(nM) |
| iMab         | 7.4                       | 17                           | 0.2           |                           |                              |               |
| 3BNC117/iMab | 8.0                       | 16                           | 0.2           | 1.0                       | 58                           | 5.6           |
| 3BNC117      |                           |                              |               | 0.7                       | 31                           | 4.8           |

B

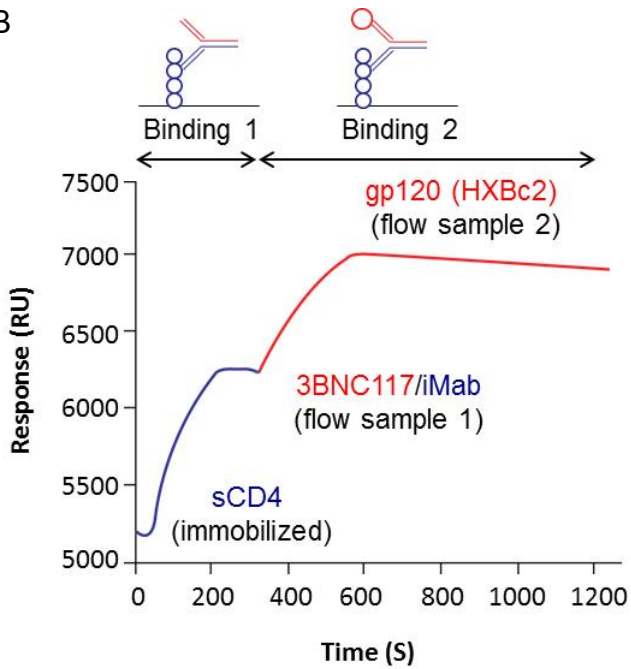

Supplement: NIHMS793158-supplement-1.pdf [file NIHMS793158-supplement-1.pdf]
