# Supplementary material
Source: PubMed Central journal article supplement (PMC4972332)

Figure S2

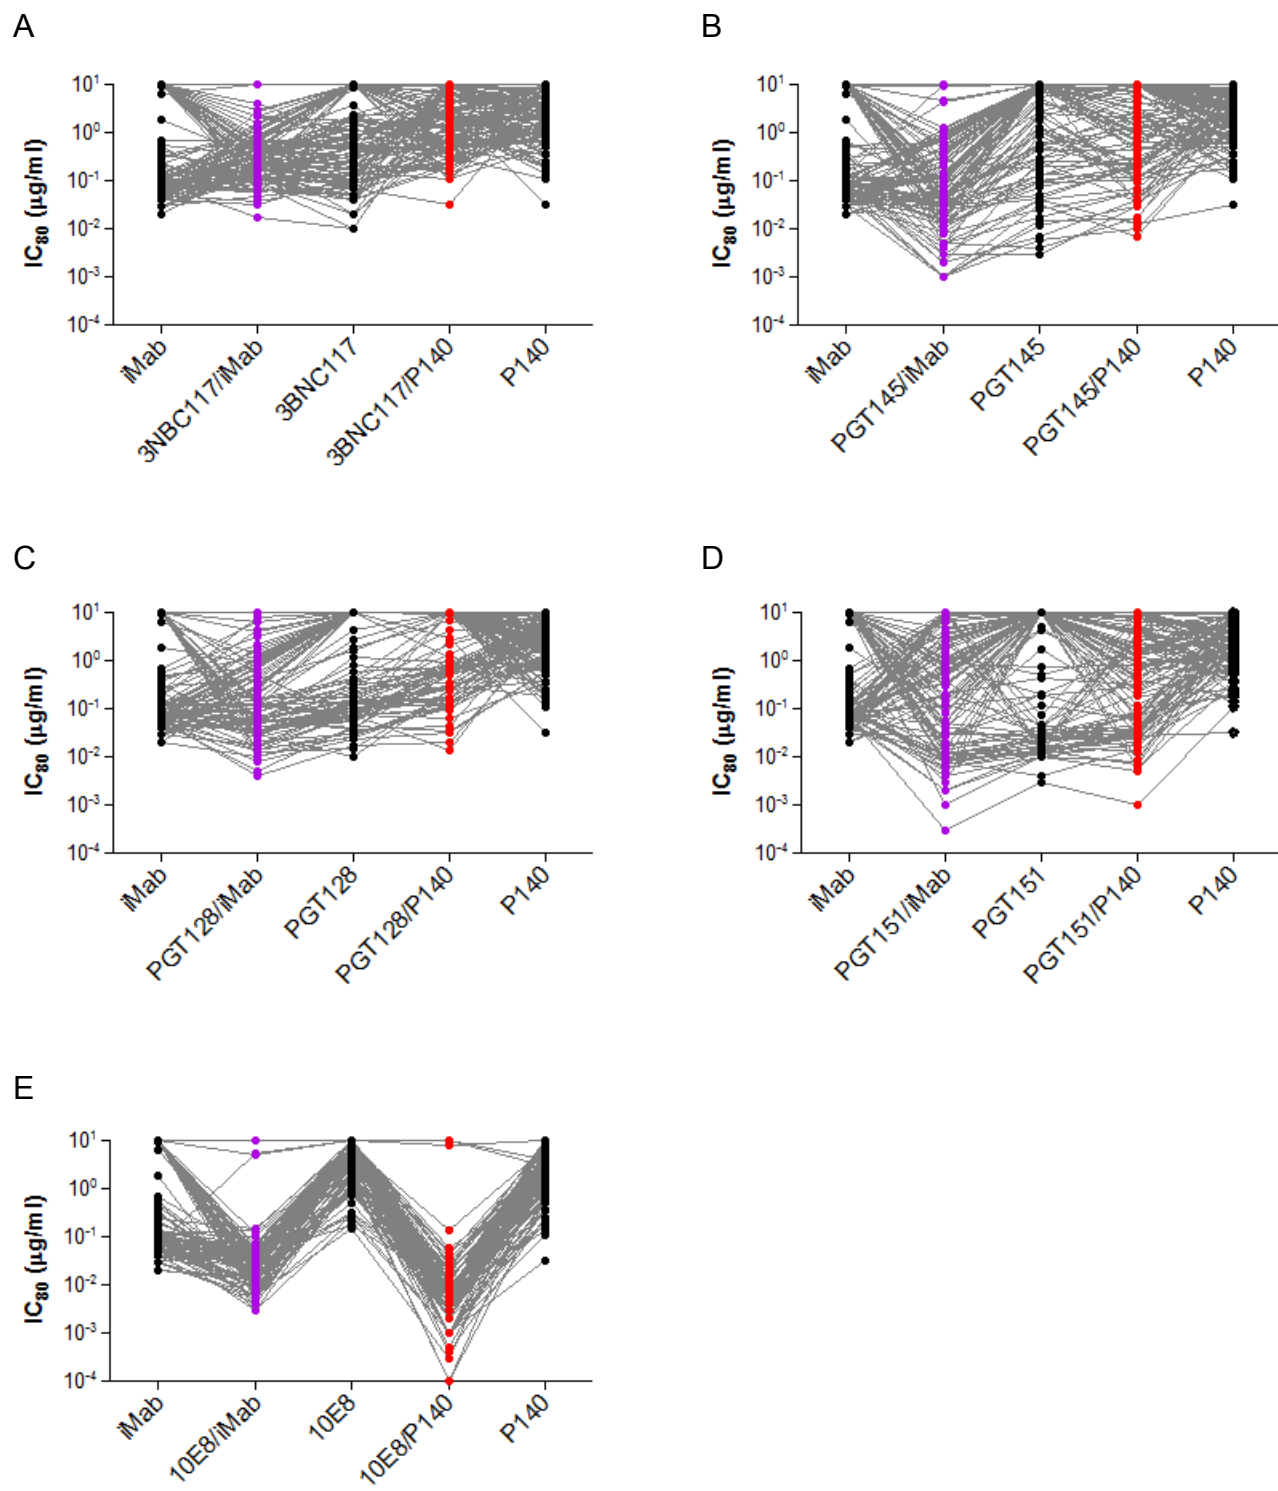

Supplement: NIHMS793158-supplement-2.pdf [file NIHMS793158-supplement-2.pdf]
