# Supplementary material
Source: PubMed Central journal article supplement (PMC4972332)

Figure S3

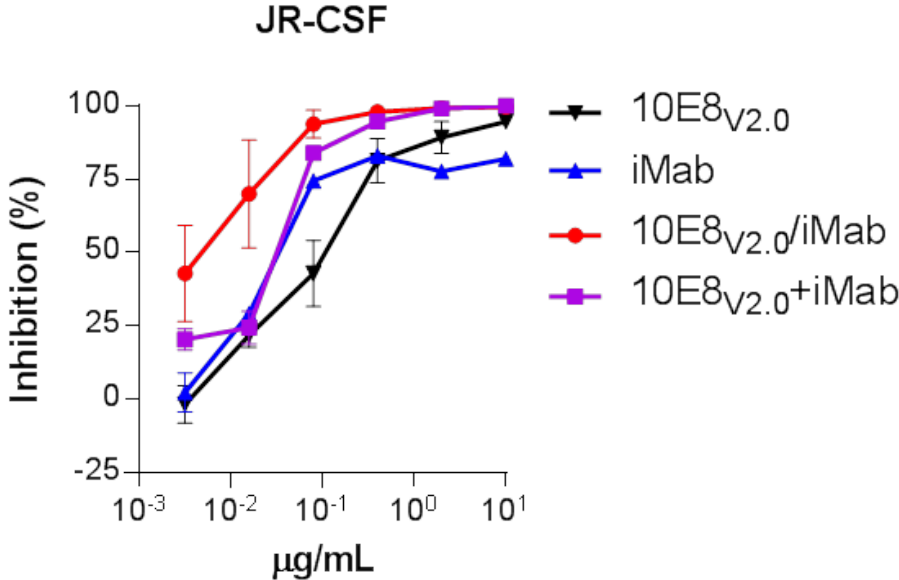

Supplement: NIHMS793158-supplement-3.pdf [file NIHMS793158-supplement-3.pdf]
