# Supplementary material
Source: PubMed Central journal article supplement (PMC4972332)

A

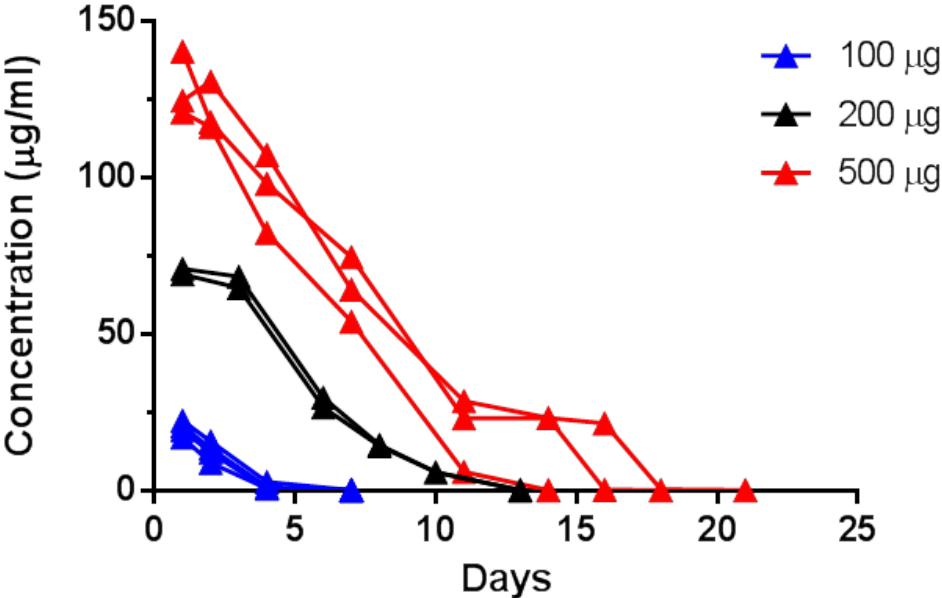

B

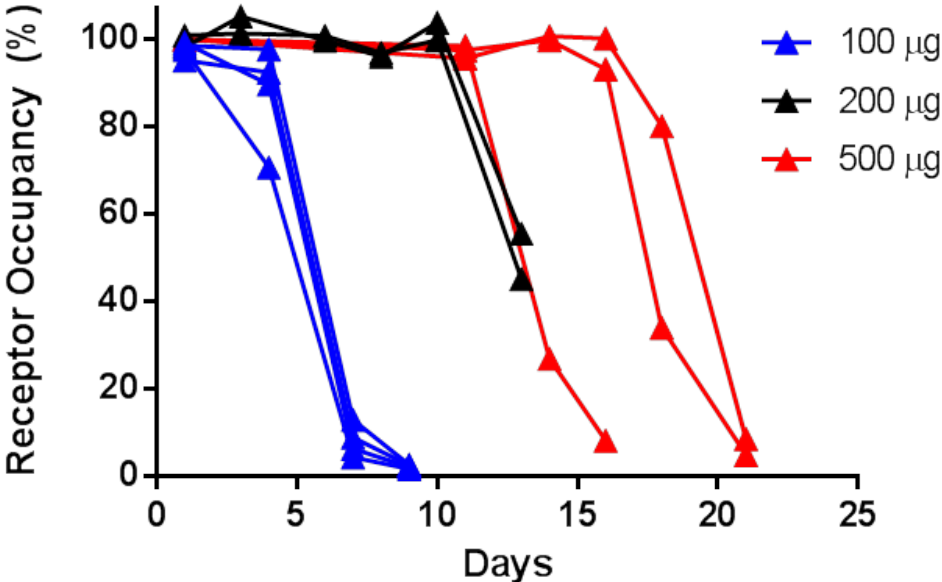

Supplement: NIHMS793158-supplement-6.pdf [file NIHMS793158-supplement-6.pdf]
