# Supplementary material
Source: PubMed Central journal article supplement (PMC4972332)
Supplement: NIHMS793158-supplement-8.pdf [file NIHMS793158-supplement-8.pdf]

**Table S2, Related to Figure 4.** HIV-1 neutralizing activity of 10E8<sub>v1.1</sub>/P140 and 10E8<sub>v2.0</sub>/iMab against a diverse panel of 118 Tier-2 HIV-1 Env pseudoviruses.

|                            | HIV-1 Neutralizing Activity |               |                          |               |                     |
|----------------------------|-----------------------------|---------------|--------------------------|---------------|---------------------|
|                            | IC <sub>50</sub> (μg/mL)    |               | IC <sub>80</sub> (μg/mL) |               | MPI to ≥ 80%<br>(%) |
|                            | <u>Mean</u>                 | <u>Median</u> | <u>Mean</u>              | <u>Median</u> |                     |
| 10E8 <sub>v1.1</sub> /P140 | 0.002                       | 0.002         | 0.011                    | 0.012         | 97.5                |
| 10E8 <sub>v2.0</sub> /iMab | 0.002                       | 0.002         | 0.006                    | 0.008         | 97.5                |
